# Supplementary material for: A Family of Diverse Kunitz Inhibitors from Echinococcus granulosus Potentially Involved in Host-Parasite Cross-Talk
Source: PubMed Central journal article supplement (PMC2740865; doi:10.1371/journal.pone.0007009), 2009-09-17
Supplement: pone.0007009.s001.pdf [file pone.0007009.s001.pdf]

**Table S1.** The *E. granulosus* Kunitz protein family.

| Name          | cDNA sequence data <sup>a</sup> |                              |                                                            | Predicted protein parameters <sup>b</sup> |                    |                      |      |        | Similar Kunitz domain <sup>e</sup>                                                                                                           | Close platyhelminth proteins <sup>e</sup>                                                                                                                                                                                            |
|---------------|---------------------------------|------------------------------|------------------------------------------------------------|-------------------------------------------|--------------------|----------------------|------|--------|----------------------------------------------------------------------------------------------------------------------------------------------|--------------------------------------------------------------------------------------------------------------------------------------------------------------------------------------------------------------------------------------|
|               | Cluster ID (reads)              | cDNA source                  | Accession numbers                                          | Consensus (nt)                            | SP/MP (aa)         | MW (Da) <sup>c</sup> | pI   | charge |                                                                                                                                              |                                                                                                                                                                                                                                      |
| <b>EgKU-1</b> | EGC000603 (6)                   | PS/peps/H <sup>+</sup>       | CN650596, CN650753, CN650941, CN652374, CN652433, BI244287 | 359                                       | 20/58 <sup>d</sup> | 6599.5               | 9.2  | +6     | sp <b>P00985</b> IVB2_HEMHA - [23-75] 1e <sup>-10</sup><br>Venom Basic Inhibitor 2 <i>H. haemacathus</i>                                     | _9                                                                                                                                                                                                                                   |
| <b>EgKU-2</b> | EGC000598 (5)                   | PS/peps/H <sup>+</sup>       | CN650229, CN650436, CN650784, CN652059, BI244281           | 626 (long 3'UTR)                          | 20/101             | 12258.8              | 8.8  | +4     | tr <b>Q8NT7L9</b> BOMMO - [28-81] 0.0009<br>Serine Protease Inhibitor 1 <i>Bombyx mori</i>                                                   | <b>EL746785</b> <sup>h</sup> - <i>T. solium</i> larva 85% identity (98/115 aa)                                                                                                                                                       |
| <b>EgKU-3</b> | EGC001164 (1)                   | PS/peps/H <sup>+</sup>       | BQ173695                                                   | 354                                       | 18/57              | 6405.4               | 5.1  | -1     | sp <b>P31713</b> ISH1_STOHE - [23-73] 6e <sup>-13</sup><br>Kunitz Inhibitor 1 <i>Stoichactis helianthus</i>                                  | <b>XvEMa04137</b> - <i>E. multilocularis</i> larva 98% identity (74/75 aa)                                                                                                                                                           |
| <b>EgKU-4</b> | EGC004311 (1)                   | PS/peps/H <sup>+</sup>       | CN652174                                                   | 535 (long 5'UTR)                          | 20/64              | 7288.4               | 10.1 | +14    | sp <b>P00978</b> AMBP_BOVIN - [25-75] 7e <sup>-12</sup><br>Alpha-1-microglobulin inter-alpha-trypsin inhibitor light chain <i>Bos taurus</i> | <b>XvEMa03312</b> - <i>E. multilocularis</i> larva 92% identity (78/84 aa)<br><b>EL763407</b> - <i>T. solium</i> adult 63% identity (53/84 aa) <sup>i</sup>                                                                          |
| <b>EgKU-5</b> | EGC002977 (2)                   | PS<br>PS/peps/H <sup>+</sup> | CN649551<br>CN650837                                       | 317                                       | 29/60              | 7239.3               | 9.6  | +9     | tr <b>O54819</b> TFPI_MOUSE - [37-87] 2e <sup>-12</sup><br>Tissue factor pathway inhibitor 1 <i>Mus musculus</i>                             | <b>BW635664</b> - <i>D. ryukyuvensis</i> adult 60% identity (31/51 aa, KU domain)<br><b>DN300487</b> <sup>j</sup> and <b>DN307650</b> <sup>j</sup> - <i>S. mediterranea</i> mature hermaphrodites 56% identity (29/51 aa, KU domain) |
| <b>EgKU-6</b> | EGC003000 (2)                   | PS                           | CN649590, CN649996                                         | 416                                       | 18/82              | 9778.9               | 6.9  | 0      | tr <b>O45881</b> CAEEL - [24-74] 7e <sup>-12</sup> Protein W01F3.3, partially confirmed<br><i>Caenorhabditis elegans</i>                     | <b>EL743839</b> - <i>T. solium</i> larva 75% ident. (75/100 aa)                                                                                                                                                                      |
| <b>EgKU-7</b> | EGC002672 (1)                   | PS/peps/H <sup>+</sup>       | CN648947                                                   | 327 (no 3'UTR)                            | 20/79              | 9108.0               | 5.1  | -3     | sp <b>Q868Z9</b> PPN_DROME - [25-75] 7e <sup>-12</sup><br>Papilin (precursor) <i>D. melanogaster</i>                                         | _9                                                                                                                                                                                                                                   |
| <b>EgKU-8</b> | -                               | PS/peps/H <sup>+</sup>       | FJ031017                                                   | 228                                       | 18/57 <sup>d</sup> | 6519.4               | 7.8  | +1     | tr <b>Q8WPI2</b> BOOMI - [23-73] 1e <sup>-12</sup><br><i>Boophilus microplus</i> boophilin                                                   | <b>XvEMa16368</b> - <i>E. multilocularis</i> larva 98% identity (74/75 aa)                                                                                                                                                           |

<sup>a</sup>For *EgKU-1-EgKU-7*, identified while surveying the protoscolex transcriptome, data include: i) the EST cluster identification in PartiGeneDB (<http://www.compsysbio.org/partigene/>), EGC00XXXX and the number of reads in the cluster; ii) the libraries from which ESTs were derived, designed as: PS, untreated protoscolexes; PS/peps/H<sup>+</sup>, protoscolexes treated with pepsin at pH 2; iii) the NCBI accession number of ESTs in the cluster; iv) the size and relevant features of the consensus sequence (except for *EgKU-7*, this accounts for the full-length cDNA). For *EgKU-8*, data include: i) the source of RNA used for RT-PCR; ii) the NCBI accession number of the cDNA cloned on the basis of the putative *E. multilocularis* orthologue, as detailed in the text; iii) the size of the full coding sequence thus isolated.

<sup>b</sup>Analyses were carried out with the tools available at the ExPASy Proteomics Server (<http://expasy.org.ch/>): "Translate", for prediction of protein sequences; "SignalP", for prediction of signal peptides (SP), signal peptidase cleavage sites and, correspondingly, mature proteins (MP); and "ProtParam", for calculation of the theoretical MW (average) and pI of predicted mature proteins; the charge was estimated as the difference between positively and negatively charged amino acids. The consensus sequence of clustered ESTs was used for *EgKU-1-EgKU-7*.

<sup>c</sup>The theoretical MW of predicted mature proteins (estimated as detailed in b) minus 6 Da is indicated, under the assumption that the six conserved Cys residues of the Kunitz domains form disulphide bridges in native proteins.

<sup>d</sup>The experimentally determined N-terminus of the native protein directly isolated from protoscolexes confirmed the SignalP prediction.

<sup>e</sup>The predicted full-length *EgKU-1-EgKU-8* were analyzed by InterProScan at ExPASy and found to hit InterPro 002223: Proteinase inhibitor I2, Kunitz metazoa. The Kunitz domain showing the highest score in PD000222 was recorded for every protein. Data include: the accession number in Swiss-Prot (sp) or TrEMBL (tr) and name of the protein bearing the domain, the score and the similarity region in the *E. granulosus* protein.

<sup>f</sup>Related platyhelminth proteins were identified blasting the predicted full-length *EgKU-1-EgKU-8* against 'non-human, non-rodent ESTs' in dbEST (option 'est\_others' at the NCBI server), and *E. multilocularis* ESTs available at 'Full-Echinococcus' (<http://fullmal.hgc.jp/em/docs/blast.html/>). For each putative protein, data include: i) an identifier of the corresponding EST - the NCBI accession number for *T. solium*, *D. ryukyuvensis* and *S. mediterranea*; and the clone name in Full-Echinococcus for *E. multilocularis*; ii) the cDNA library from which each EST was derived; iii) the level of identity with the corresponding *E. granulosus* protein and the length of the alignment. In the case of *EgKU-5*, identity is over the 51 aa of the Kunitz domain (between conserved Cys). Only the predicted protein showing the highest similarity with every *E. granulosus* molecule is indicated for each platyhelminth.

<sup>g</sup>Proteins close to *EgKU-1* and *EgKU-7* were the same as for *EgKU-4* and *EgKU-6*, respectively, but the identity level was lower than for the latter.

<sup>h</sup>EST does not contain the full coding sequence: as shown in Fig 1b (*Ts-2*), the sequence translated from EL746785 has no starting Met.

<sup>i</sup>Two additional *T. solium* ESTs with about 60% identity with *EgKU-4* were identified: EL763445 (adult) and EL740737 (larva).

<sup>j</sup>These ESTs were assigned to transcript mk4.029059.00.01 in the *S. mediterranea* Genome Database (SmedGD: <http://smedgd.neuro.utah.edu>).
